# Supplementary material
Source: PubMed Central journal article supplement (PMC4787642)
Supplement: logp727297.wt1_default.pdf [file logp727297.wt1_default.pdf]

Number of participants receiving one or more treatment sessions for commonly documented interventions

| Intervention                            | No of participants |
|-----------------------------------------|--------------------|
| Promotion of activities of daily living | 83                 |
| Reduction of trip hazards               | 81                 |
| Walking practice                        | 77                 |
| Medication review                       | 67                 |
| Blood pressure assessment               | 50                 |
| Disability equipment                    | 42                 |
| Referral to other community services    | 31                 |
| Continence advice                       | 30                 |
| Referral to medical falls clinic        | 19                 |
